# Supplementary material
Source: PubMed Central journal article supplement (PMC2797903)

**A**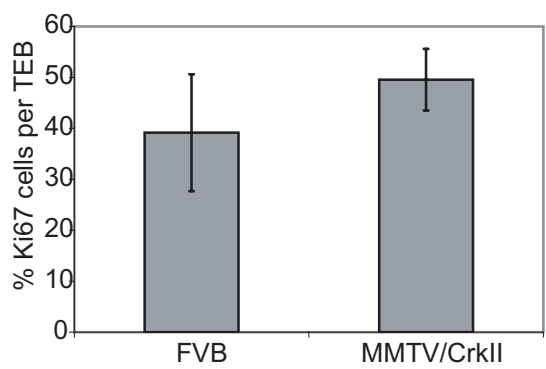**B**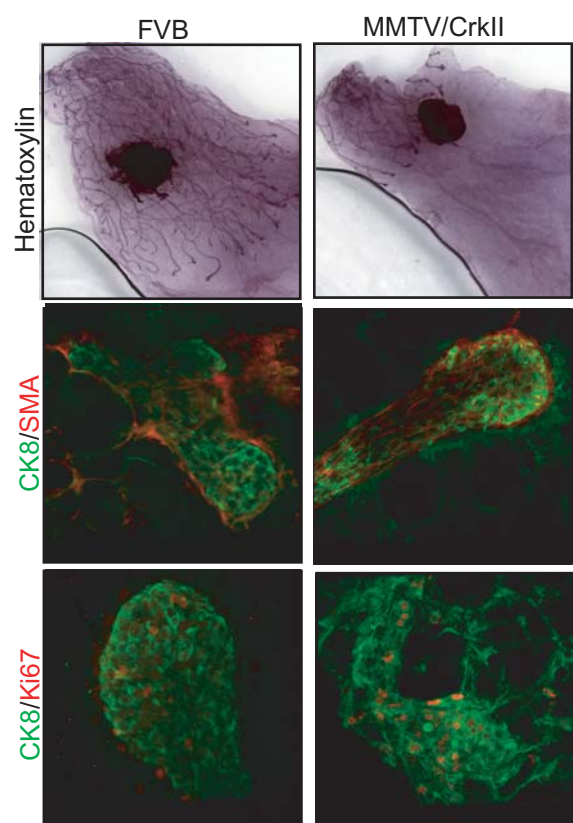

Supplement: mmc1.pdf [file mmc1.pdf]

A

CK8

ZO-1

E-cadherin

Merge

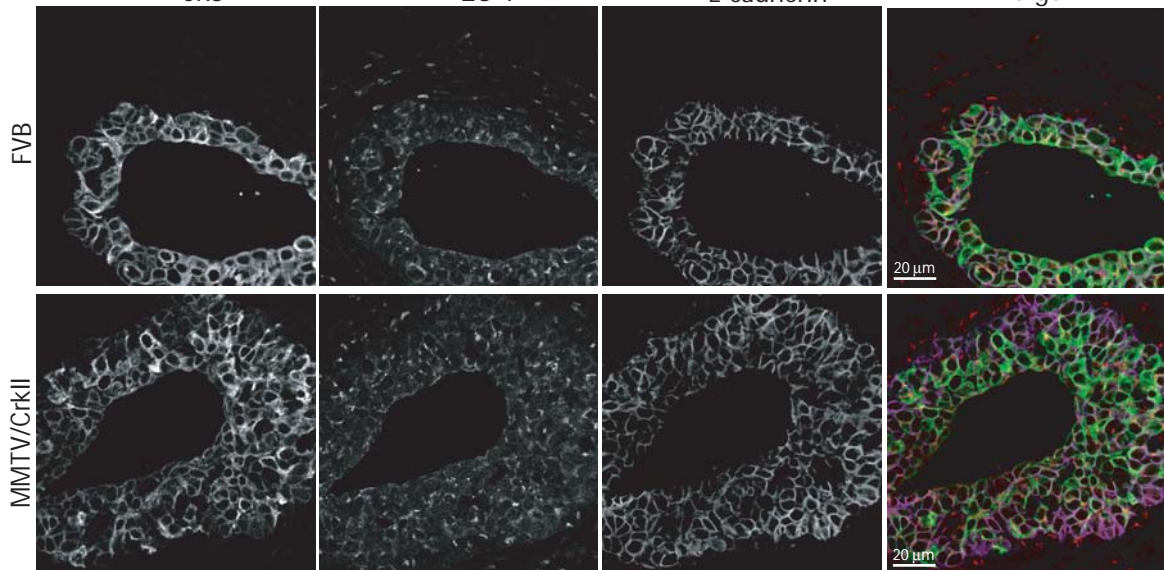

B

CK8

ZO-1

Crk

Merge

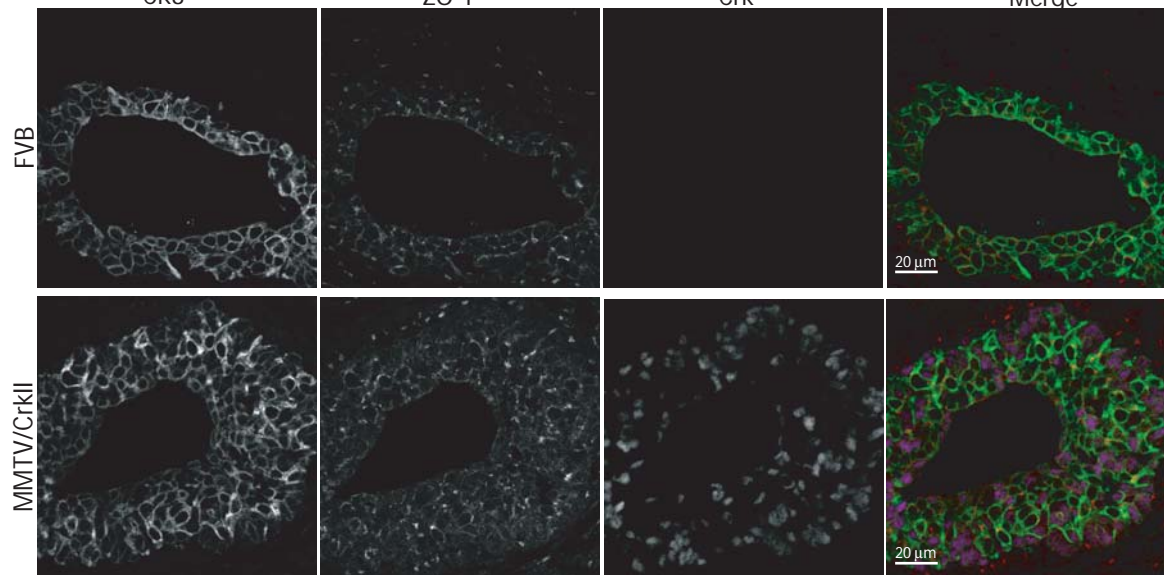

Supplement: mmc2.pdf [file mmc2.pdf]

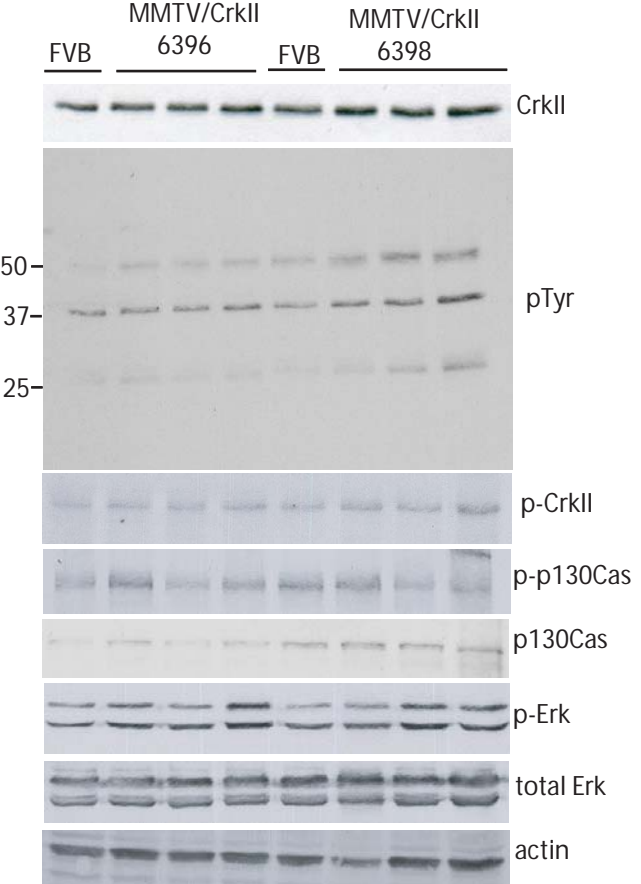

Supplement: mmc3.pdf [file mmc3.pdf]

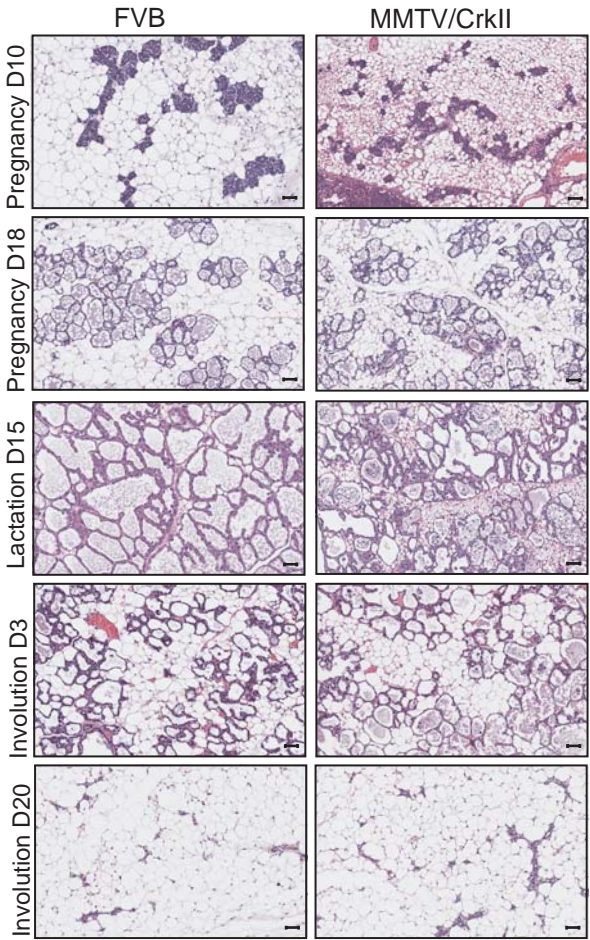

Supplement: mmc4.pdf [file mmc4.pdf]

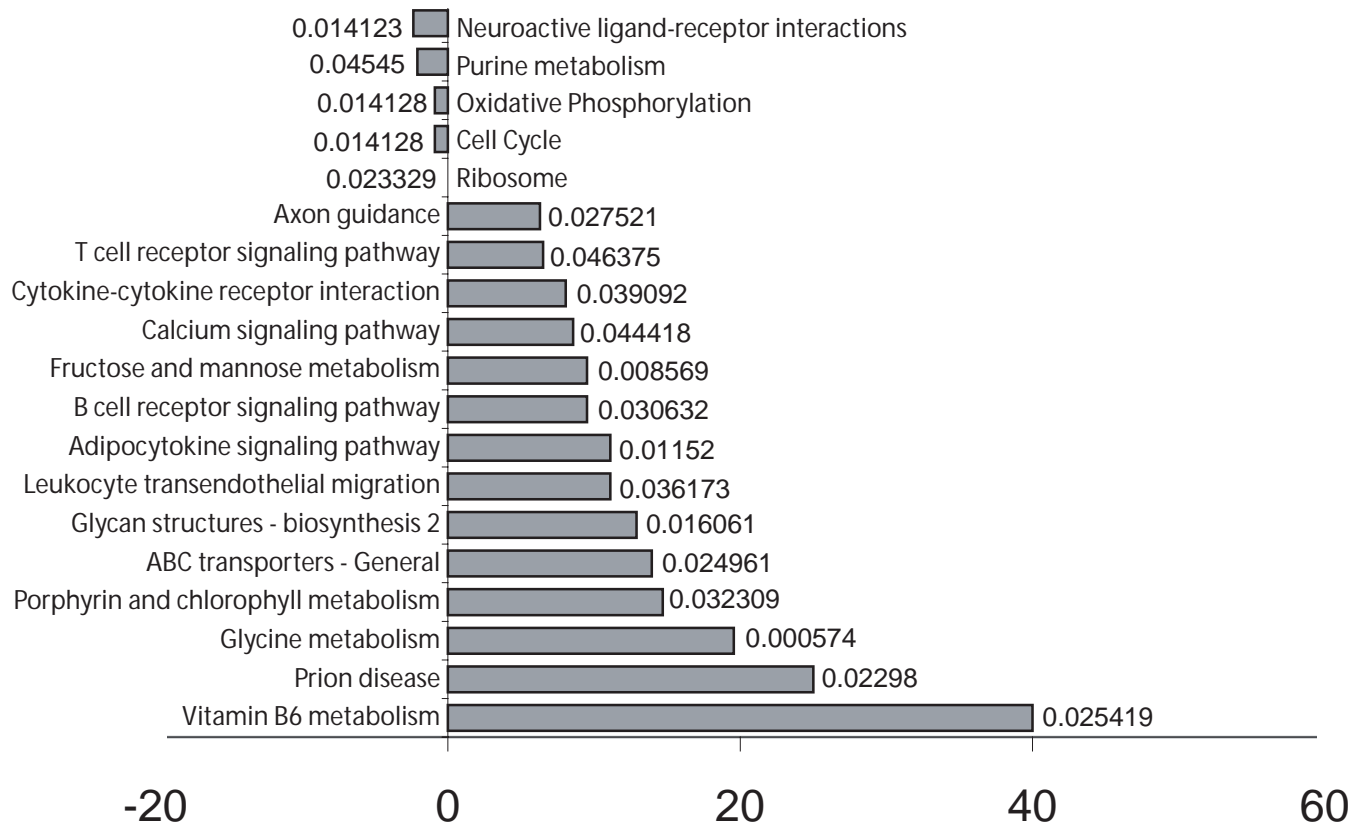

Supplement: mmc5.pdf [file mmc5.pdf]

## A - Biological Processes

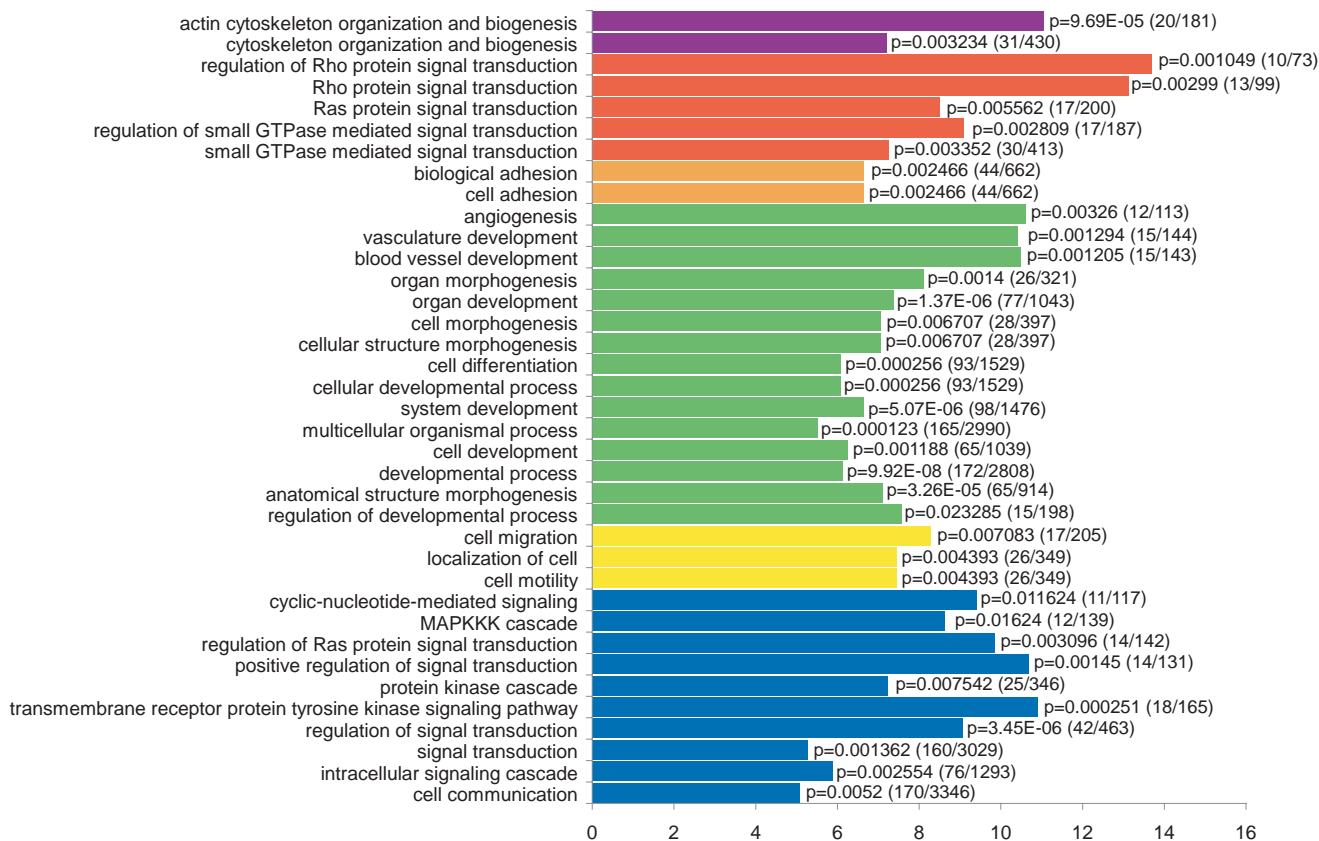

## B - Molecular Functions

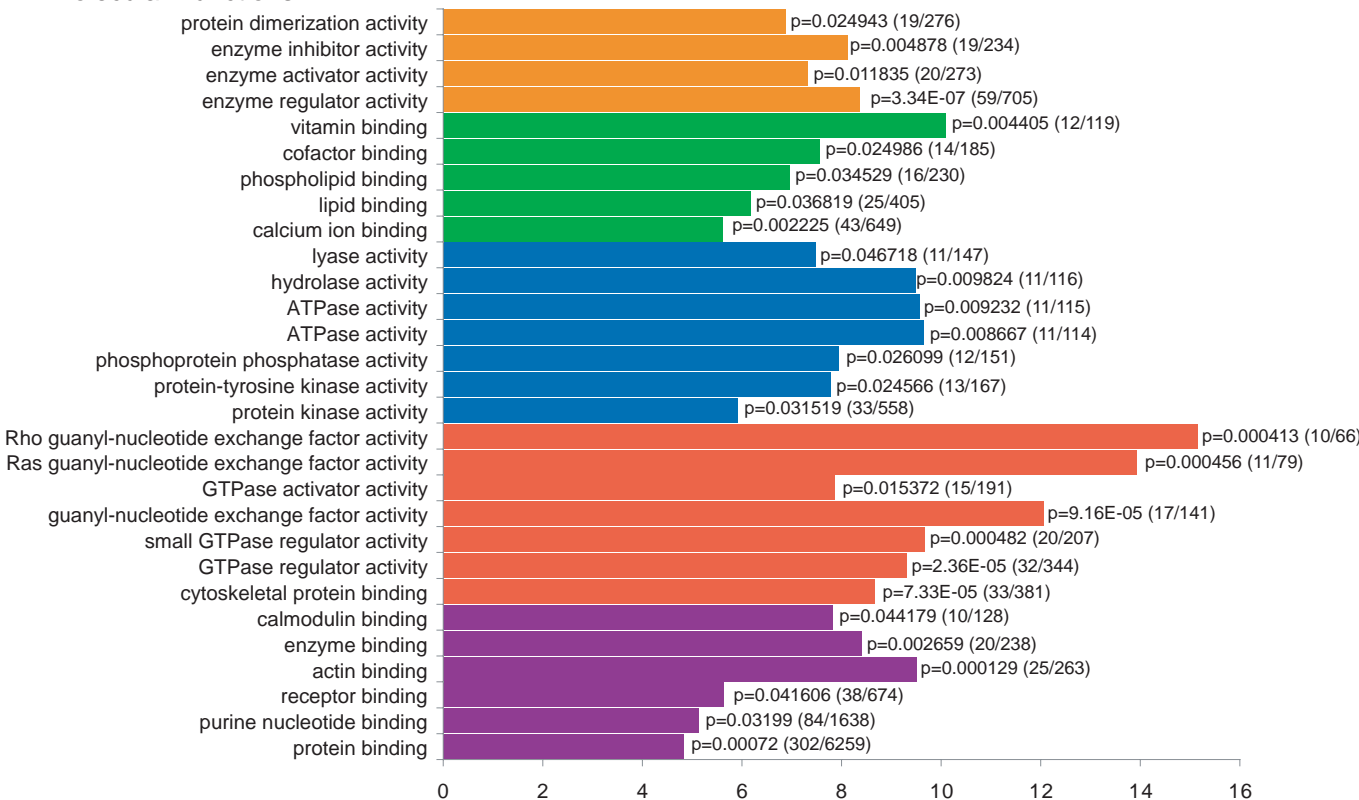

Supplement: mmc6.pdf [file mmc6.pdf]

FVB

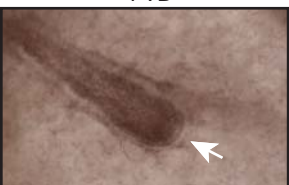

MMTV/CrkII

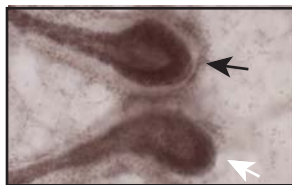

Supplement: mmc7.pdf [file mmc7.pdf]
